# Supplementary material for: Mutational analysis to explore long-range allosteric couplings involved in a pentameric channel receptor pre-activation and activation
Source: eLife. 2021 Sep 30;10:e60682. doi: 10.7554/eLife.60682 (PMC8504973; doi:10.7554/eLife.60682)
Supplement: Figure 1—source data 1. [file elife-60682-fig1-data1.xlsx]

## Sheet: Feuil1
FLUO	Bim136 Q101W		Bim136 E26Q		Bim136 Y28F				Bim136 D32E		Bim136 E222Q		Bim136 H235Q		Bim136 propofol		Bim136 H235Q & propofol		Bim136 H235F		Bim136 L157A		Bim136 L246A			Bim250		Bim250 H235F		Bim250 L157A		Bim250 L246A			Bim135 W72		Bim135 W72F		Bim135 L157A		Bim135 H235F		Bim135 H235Q		Bim135 H235Q Propofol		Bim135 Propofol
[H+]	Mean	SD	Mean	SD	Mean	SD			Mean	SD	Mean	SD	Mean	SD	Mean	SD	Mean	SD	Mean	SD	Mean	SD	Mean	SD		Mean	SD	Mean	SD	Mean	SD	Mean	SD		Mean	SD	Mean	SD	Mean	SD	Mean	SD	Mean	SD	Mean	SD	Mean	SD
1e-08	0.679268	0.0254245	0.535675	0.0493641	0.697572	0.033701			0.671502	0.019689	0.655331	0.0275729	0.704489	0.0230684	0.668357	0.0238665	0.703019	0.0184627	0.700378	0.0433291	0.655027	0.0129488	0.64966	0.0105464		0.600986	0.0585147	0.53687	0.00300672	0.538878	0.0374085	0.654243	0.0282605		0.699308	0.0207037	0.791357	0.023564	0.741358	0.0164422	0.720567	0.0174356	0.745659	0.0341269	0.778457	0.0393543	0.725265	0.0209934
3.98e-08	0.675964	0.0170031	0.539062	0.00773278	0.715327	0.0159463			0.6805	0.00446105	0.652645	0.0190038	0.691207	0.016266			0.700164	0.00734715	0.705947	0.0545773	0.648615	0.0169587	0.649106	0.00293083		0.595654	0.0158471	0.541814	0.00924385	0.513781	0.0268015	0.637746	0.0364423		0.701744	0.018463	0.809312	0.00441923	0.741763	0.00784873	0.72488	0.0110088	0.74476	0.0342448	0.80002	0.0199631
1e-07	0.666834	0.0146107	0.523612	0.0191789	0.705514	0.0369171			0.632231	0.00317248	0.648321	0.0108085	0.685253	0.0133387	0.664339	0.0168978	0.684583	0.013621	0.68737	0.0218276	0.640307	0.0141154	0.629887	0.0135112		0.609314	0.0234278	0.555642	0.00447524	0.547239	0.0248322	0.635411	0.0249351		0.672377	0.0137531	0.822702	0.0031955	0.733006	0.00728658	0.730215	0.0267821	0.704493	0.0217414	0.738771	0.0217414	0.741761	0.0169754
3.16e-07	0.604632	0.0200659	0.519752	0.0220918	0.705427	0.0166057			0.617043	0.026805	0.582925	0.0227728	0.664382	0.00631968	0.646435	0.0133087	0.665419	0.00850131	0.667855	0.0468485	0.641392	0.0102653	0.62746	0.00778481		0.64165	0.0306442	0.559105	0.00697436	0.598047	0.0446593	0.645883	0.00792548		0.57339	0.0256604	0.842929	0.0315436	0.692221	0.0124301	0.687956	0.0403928	0.661923	0.020191	0.684079	0.020191	0.689653	0.0148207
1e-06	0.501356	0.0226564	0.503348	0.0226139	0.704169	0.00257458			0.560004	0.00764537	0.547614	0.0184221	0.626171	0.0112948	0.608644	0.0161051	0.564549	0.017726	0.629648	0.0208298	0.602932	0.0183773	0.606623	0.0112255		0.731245	0.0612803	0.566783	0.0133786	0.695648	0.0433865	0.690505	0.0173774		0.458803	0.017715	0.882435	0.0194574	0.578257	0.032019	0.592632	0.0223591	0.606392	0.0306262	0.547021	0.0200018	0.589949	0.0104975
3.16e-06	0.427403	0.0315157	0.46497	0.0216146	0.686409	0.0208641			0.498093	0.0169111	0.50487	0.00843723	0.575913	0.00554595	0.531662	0.00467187	0.431472	0.0531137	0.59656	0.0361799	0.583577	0.0110191	0.586567	0.00779318		0.823449	0.0646717	0.629438	0.0131115	0.781173	0.0341282	0.791413	0.0145663		0.383156	0.0144327	0.89735	0.0353465	0.449991	0.0248283	0.551539	0.0130061	0.543389	0.014868	0.378002	0.014868	0.446233	0.00573247
1e-05	0.348989	0.0350056	0.402727	0.0138736	0.685652	0.00679556			0.411435	0.0192978	0.406799	0.0450126	0.508719	0.00423417	0.381661	0.0121415	0.339952	0.0157183	0.46981	0.0134204	0.551099	0.00607592	0.551687	0.0147043		0.892428	0.0639595	0.684895	0.0164735	0.810375	0.0312208	0.906019	0.023101		0.357473	0.00841864	0.909525	0.0336537	0.363273	0.010701	0.53507	0.00896981	0.54792	0.0297142	0.327599	0.0442818	0.366354	0.0084103
3.16e-05	0.307863	0.0324262	0.342203	0.0111474	0.669095	0.00927941			0.356291	0.0215643	0.326505	0.022218	0.391828	0.0392747	0.31948	0.0142537	0.280977	0.0105645	0.388721	0.018143	0.542361	0.00875781	0.48715	0.0243367		0.915736	0.0675606	0.730186	0.0183041	0.862292	0.044063	0.951503	0.000526655		0.34815	0.0134062	0.867689	0.0251116	0.350517	0.00648628	0.541665	0.00571665	0.530564	0.0137788	0.326057	0.0137788	0.342085	0.00933345
0.0001	0.279454	0.0288871	0.303276	0.00947618	0.631914	0.042161			0.314398	0.00680214	0.294365	0.013405	0.323618	0.0294351	0.297018	0.0157208	0.270146	0.0172686	0.365679	0.017831	0.520122	0.0264272	0.445351	0.00999256		0.933919	0.0606747	0.728552	0.0194348	0.937409	0.118495	0.966177	0.0274968		0.360051	0.0306257	0.814	0.0578715	0.396213	0.0211984	0.548211	0.00876728	0.542719	0.0243428	0.369631	0.0295492	0.33439	0.0281375
0.000316	0.299206	0.0250352	0.324376	0.0237471	0.416343	0.0899534			0.317391	0.00472418	0.299331	0.00979608	0.325264	0.00532736	0.286797	0.011623	0.261599	0.00276255	0.359411	0.0134412	0.518856	0.0415711	0.422552	0.00161984		0.896274	0.0572426	0.749545	0.00997298	0.917459	0.0264908	0.933309	0.0106892		0.439196	0.0464456	0.795112	0.0198903	0.456323	0.0129639	0.574878	0.00273733	0.597783	0.0277335	0.447459	0.0277335	0.38712	0.0179566
0.001	0.329105	0.0333606	0.355932	0.0159622	0.380369	0.0309474			0.313514	0.00918643	0.314856	0.00704919	0.341932	0.00733324	0.322679	0.0249409	0.27996	0.0114297	0.389033	0.0240827	0.470856	0.0350158	0.425362	0.00865839		0.866531	0.0285932	0.730028	0.0218195	0.946391	0.0178324	0.917952	0.00988855		0.558167	0.0476714	0.783894	0.00310824	0.431416	0.0153038	0.590561	0.0192052	0.65831	0.0453167	0.507422	0.0363329	0.476828	0.0094995
CURRENT	Bim136 Q101W		Bim136 E26Q		Bim136 Y28F		Bim136 Y28F & C27		Bim136 D32E		Bim136 E222Q		Bim136 H235Q		Bim136 propofol		Bim136 H235Q & propofol									Bim250									Bim135 W72		Bim135 W72F
[H+]	Mean	SD	Mean	SD	Mean	SD	Mean	SD	Mean	SD	Mean	SD	Mean	SD	Mean	SD	Mean	SD								Mean	SD								Mean	SD	Mean	SD
3.16228e-07	0.000996953	0.000788962	0.000484011	0.000374381			0.00240078	0.00139622			7.13561e-05	0.000159557														0.00238163	0.00134748								0.00233879	0.00100208	0.00151541	0.00079434
1e-06	0.0248928	0.0145947	0.00189689	0.000660253			0.0322649	0.0161512	0.00579143	0.00507886	0.000478666	0.000292856	0	0	0	0	0	0								0.0136379	0.00227421								0.0677609	0.0303892	0.0316919	0.0161255
3.16228e-06	0.376006	0.106365	0.0151573	0.00771578			0.326844	0.0998646	0.0185148	0.0225444	0.00553684	0.00380602	0.00312497	0.00120415	0.0503147	0.0553112	0.0119334	0.00488012								0.0473023	0.0320808								0.462579	0.130924	0.310074	0.0965988
1e-05	0.930509	0.0440948	0.255411	0.143619	0.00224183		0.798973	0.0776899	0.139198	0.0247838	0.143648	0.0651567	0.0495454	0.0366967												0.193167	0.138104								0.89573	0.0662363	0.783247	0.0735649
3.16228e-05	1.00173	0.0218858	0.878258	0.107943	0.0539573	0.0675019	1.02437	0.0376743	0.694548	0.170192	0.740445	0.105975	0.25422	0.0429706	1.00916	0.0223553	0.574751	0.0965358								0.662971	0.169933								1.00022	0.00754166	1.03692	0.00446262
6.30957e-05															0.979303											0.744816
0.0001	0.998429	0.00817598	0.952832	0.0280868	0.327924	0.124327	0.975131	0.0194895	0.877574	0.0202343	0.963213	0.0388226	0.572032	0.0802096			0.787274	0.100538								0.974819	0.0822945										0.922551	0.0379401
0.000316228	0.996794	0.0255322	1.01758	0.0253951	0.876648	0.0255609	0.98912	0.0296983	1.01328	0.0535036	1.00892	0.0211622	0.819875	0.11355	0.971981	0.028554	0.975529	0.0452926								0.966019	0.0402725								0.992226	0.009165	1.02724	0.0228957
