# Supplementary material for: Mutational analysis to explore long-range allosteric couplings involved in a pentameric channel receptor pre-activation and activation
Source: eLife. 2021 Sep 30;10:e60682. doi: 10.7554/eLife.60682 (PMC8504973; doi:10.7554/eLife.60682)
Supplement: Figure 6—figure supplement 2—source data 1. — To test the robustness of the fitting, the model was tested starting with the isomerization constant of LpA from Bim136-Q101W-H235F set at 100, 1000, or 100,000. The multiplication factor is calculated in comparison with Bim136-Q101W constants except for H235Q + propofol (compared to Bim136-Q101W-H235Q) and mutations on Bim250-Y197 sensor background (compared to Bim250-Y197). LpA constant was averaged on the 3 LpA values. Affinity constants used for the second binding site were K’R=5×10−5, K’pA=5×10−5, and K’A=5×10−6, affinity constants of the first binding site are shown in the table for the different LpA values and fluorescence values for each state are indicated in Figure 6—figure supplement 2. To assess how well our model fits the experimental values, the determination coefficient (R2) was calculated for each mutant with the different LpA and corresponding affinities. R2 was calculated for both fluorescence quenching (R2 Fluo) and electrophysiological response (R2 current). [file elife-60682-fig6-figsupp2-data1.xlsx]

## Sheet: Figure 9 - Source data 1
		Bim136 Q101W	Y28F	E26Q	D32E	H235Q	E222Q	Propofol	H235Q + propofol	H235F	L157A	L246A	Bim250 Y197	H235F	L157A	L246A	KR	KpA	KA
LA		10	10	100	800	7000	400	100	1500	∞	∞	∞	300	∞	∞	∞	-	-	-
LA factor		-	1	10	80	700	40	10	0.21	∞	∞	∞	30	-	-	-	-	-	-
LpA		20	1.5x106	300	40	140	30	60	25	100	1000	270	13	400	50	50	3.6x10-6	1x10-6	1x10-6
(Lpa H235F = 100)	R2 Fluo	0.96	0.95	0.94	0.93	0.97	0.90	0.97	0.99	0.97	-0.17	-0.16	0.97	0.92	0.93	0.77	-	-	-
	R2current	0.99	0.96	0.99	0.99	0.97	0.99	0.99	0.98	-	-	-	0.93	-	-	-	-	-	-
LpA		100	1.5x107	2500	350	1000	250	800	200	1000	4000	4000	70	3000	300	300	2.4x10-6	4.5x10-7	4.5x10-7
(Lpa H235F = 1000)	R2 Fluo	0.94	0.95	0.95	0.90	0.96	0.86	0.96	0.98	0.96	0.30	0.30	0.94	0.93	0.94	0.79	-	-	-
	R2current	0.99	0.83	0.99	0.99	0.97	0.99	0.99	0.98	-	-	-	0.93	-	-	-	-	-	-
LpA		10000	1.7x109	300000	30000	170000	30000	50000	15000	100000	400000	400000	5000	500000	30000	30000	2.0x10-6	1.4x10-7	1.4x10-7
(Lpa H235F = 100 000)	R2 Fluo	0.91	0.95	0.94	0.86	0.96	0.82	0.94	0.98	0.95	0.17	0.17	0.90	0.96	0.92	0.78	-	-	-
	R2current	0.99	0.88	0.99	0.99	0.97	0.99	0.99	0.98	-	-	-	0.93	-	-	-	-	-	-
LpA factor		-	75000	15	2	7	1.5	3	0.18	5	50	13.5	0.65	30.8	3.85	3.85	-	-	-
		-	150000	25	3.5	10	2.5	8	0.2	10	40	40	0.7	42.9	4.29	4.29	-	-	-
		-	170000	30	3	17	3	5	0.09	10	40	40	0.5	100	6	6	-	-	-
LpA factor average		-	131667	23.3	2.83	11.3	2.33	5.33	0.15	8.33	43.3	31.2	0.62	57.9	4.71	4.71	-	-	-
			± 50 083	± 7,6	± 0,76	± 5,13	± 0,76	± 2,52	± 0,06	± 2,89	± 5,78	± 15,3	± 0,10	± 37,0	± 1,14	± 1,14
